# Supplementary material
Source: Springer Nature journal article supplement (https://www.springermedizin.de/resource/supplementary/13601_2011_277_MOESM1_ESM.pdf/9677842)

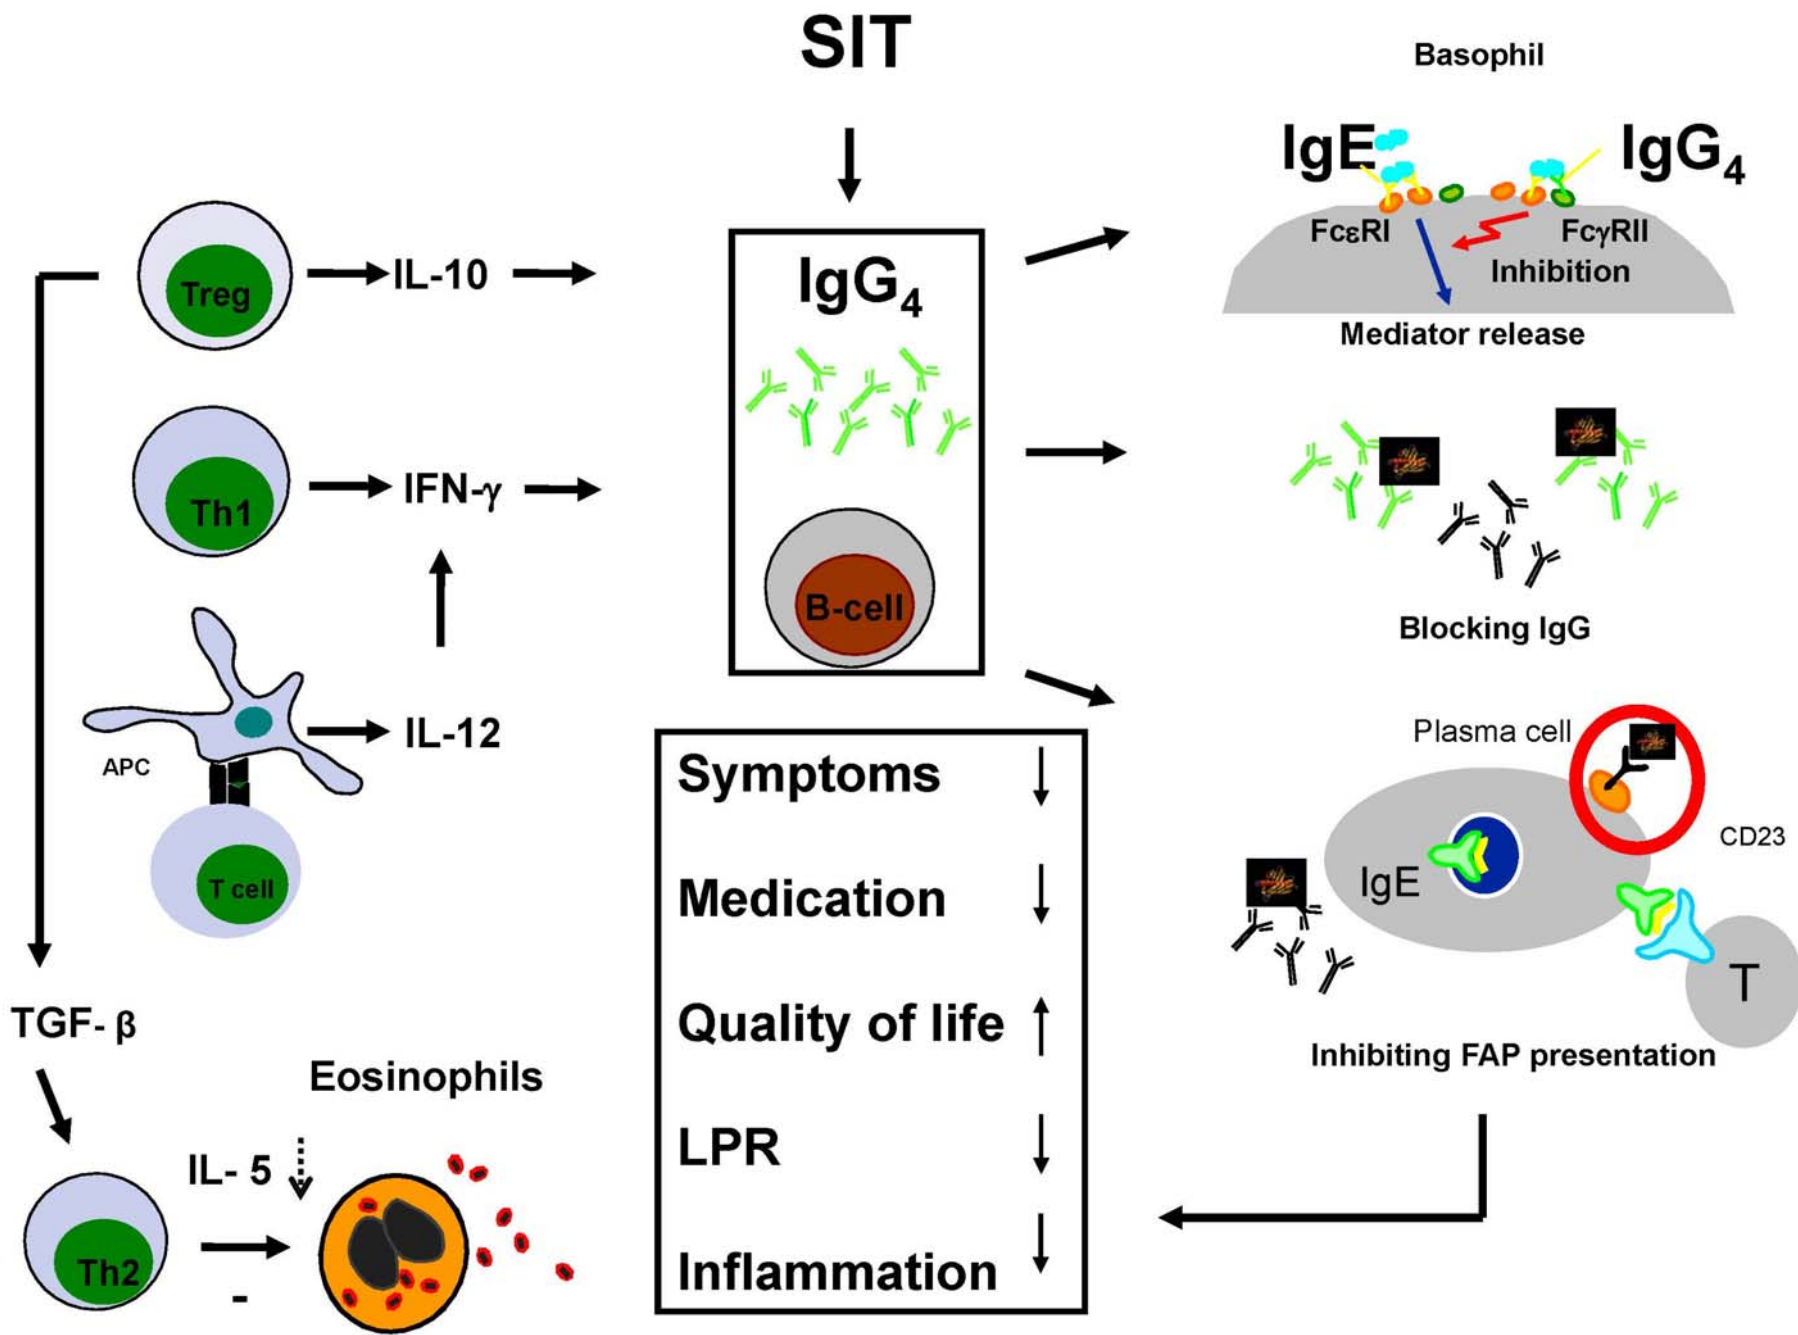

Supplement: MOESM1 [file 9677842]
